# Supplementary material for: Effect of diabetic duration on hemorheological properties and platelet aggregation in streptozotocin-induced diabetic rats
Source: PubMed Central journal article supplement (PMC4762006; doi:10.1038/srep21913), 2016-02-22
Supplement: srep21913-s1.pdf [file srep21913-s1.pdf]

# Effect of diabetic duration on hemorheological properties and platelet aggregation in streptozotocin-induced diabetic rats

Eunseop Yeom<sup>1</sup>, Hyeokjun Byeon<sup>1</sup> and Sang Joon Lee<sup>1\*</sup>

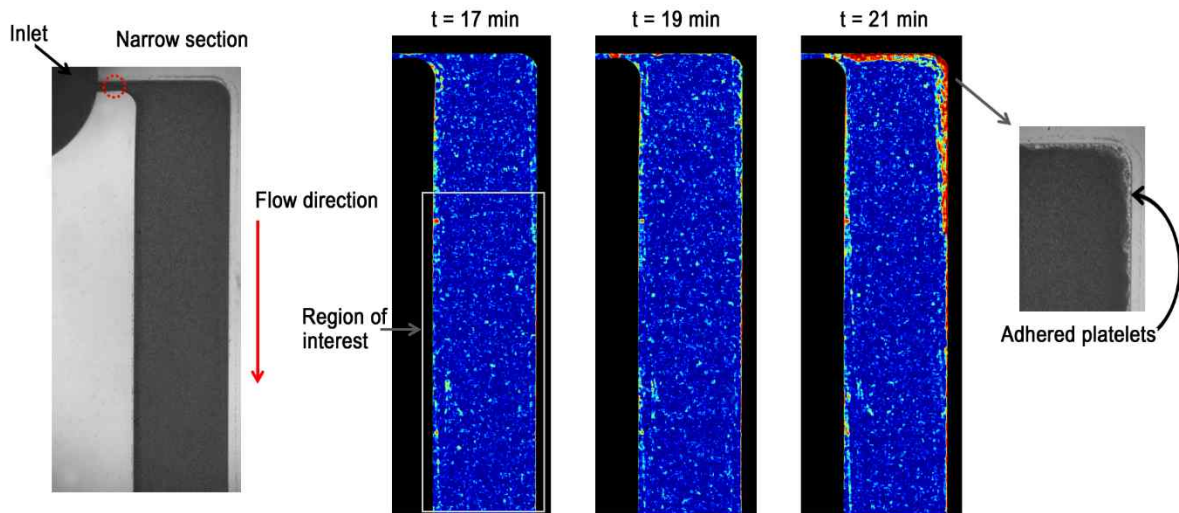

**Supplementary Fig. 1** Temporal evolution of platelets adhesion in a rat model with diabetic duration of 20 days. The inlet of the straight channel has narrow section of 100  $\mu\text{m}$  in width. Correlation maps at specific instants ( $t=17,19$ , and 21 min) and magnified optical image.

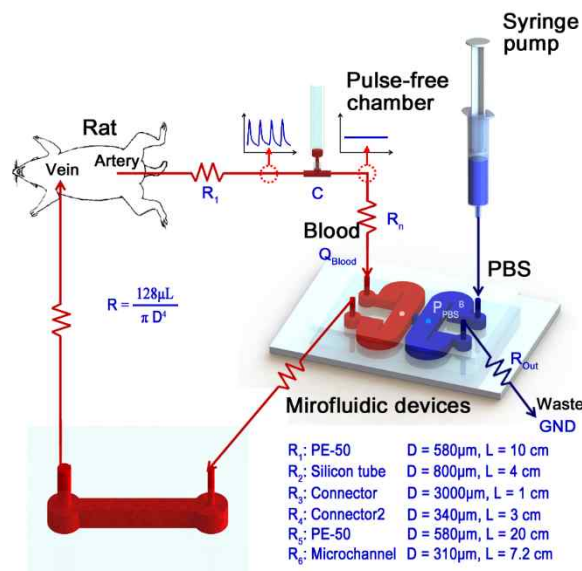

**Supplementary Fig. 2** Discrete fluidic circuit of the proposed measurement system include fluidic resistances ( $R_1 \cdots R_n$ ), air compliance ( $C$ ), flow rate ( $Q_{\text{Blood}}$ ), and the pressure at the hemodynamic balancing state ( $P_{\text{PBS}}^B$ ). The syringe and microfluidic devices were created by the authors using SolidWorks software.
